1 Title Page

2  
3 Women's autonomy, neonatal, infant and under-five mortality in the Upper East  
4 Region of Ghana

5  
6  
7  
8 Authors:

9 †FABIAN Sebastian Achana<sup>1, 2</sup>; &Augustine Tanle<sup>1</sup>; &David Teye Doku<sup>1</sup>

10  
11  
12  
13 Affiliations:

14 1: Department of Population and Health, University of Cape Coast, Central Region, Ghana

15  
16 2: Navrongo Health Research Centre, Upper East Region, Ghana

17  
18  
19 Email addresses of authors

20 Fabian Sebastian Achana: [fsachana@gmail.com](mailto:fsachana@gmail.com)

21 Augustine Tanle: [atanle@ucc.edu.gh](mailto:atanle@ucc.edu.gh)

22 David Teye Doku: [ddoku@ucc.edu.gh](mailto:ddoku@ucc.edu.gh)

23  
24 Corresponding author

25 \*Fabian Sebastian Achana: [fsachana@gmail.com](mailto:fsachana@gmail.com)

26  
27 Keywords: Women's autonomy, neonatal, infant and under-five mortality, Upper East  
28 Region, Ghana

29  
30 Data Availability

31 Data are available for public use and can be obtained by request to the Director of Navrongo  
32 Health Research Centre, Box 114, Navrongo, [lonpoa@gmail.com](mailto:lonpoa@gmail.com) or  
33 [Patrick.ansah@navrongo-hrc.org](mailto:Patrick.ansah@navrongo-hrc.org)

35

## Abstract

36 **Background:** Eight years to the set deadline for the 2030 SDGs, child mortality remains a  
37 major health challenge in Sub-Saharan Africa. Child survival is greatly influenced by  
38 household circumstances and mother's healthcare choices. Notwithstanding tremendous  
39 investment in women empowerment in Ghana, there is limited empirical evidence on whether  
40 women's autonomy translates into better child mortality outcomes.

41 **Objective:** To examine the association between women's autonomy and neonatal, infant and  
42 under-five mortality in the Upper East Region of Ghana.

43 **Methods:** Data were obtained from a randomized cluster household survey among 15-49 years  
44 old women in seven districts in the Upper East Region. Data analysis was restricted to 3,243  
45 women who reported ever having given birth. Based on Principal Component Analysis (PCA),  
46 we constructed an autonomy index categorized into least, moderate, and high autonomy based  
47 on responses to six questions regarding household decision-making. Bivariate and multivariate  
48 logistic regressions were used to assess the association of women's autonomy status and  
49 mortality outcomes.

50 **Results:** Attaining secondary education or higher was significantly associated with infant  
51 mortality (adjusted odds ratio (aOR)= 0.39, CI= 0.16, 0.94) and under-five mortality (aOR=  
52 0.39, CI= 0.18-0.87). Also, maternal age was significantly associated with neonatal, infant,  
53 and under-five mortality, while living in rural setting was significantly associated with lower  
54 risk of neonatal (aOR= 0.38, CI=0.19-0.75) and under-five (aOR= 0.63, CI= 0.48-0.83)  
55 mortality. However, we found that compared to women with least autonomy, infants of those  
56 with moderate autonomy (aOR= 1.76, CI 1.07-2.89) and high autonomy (aOR= 1.75; CI= 1.04-  
57 2.93) were significantly more likely to die.

58 **Conclusion:** In this study setting, women’s autonomy was not predictive of child mortality.

59 Interventions that aim to improve child mortality should pay attention to community and family

60 level factors that promote increase utilization of essential early childhood interventions.

61

62

63

64

65

66

67

68

69

70

71

72

73

74

## Introduction

75

76

77 Globally, child mortality improved substantially over the years. It is estimated that 3.7% of

78 children died before age five in 2021 compared to 8.3% in 2010 [1,2]. This notwithstanding,

79 child mortality remains a major health challenge especially in Sub-Saharan Africa where 1

80 out of every 13 children die before age five compared to 1 in 189 in the developed nations.

81 Sub-Saharan African (SSA) countries face a disproportionate burden of child mortality with

82 all six countries presenting with the highest under-five mortality of approximately 100 deaths

83 per 1,000 live births [3–5] . Within the continent, infant mortality ranges from 64 deaths per

84 1,000 live births in West Africa to 24 deaths per 1,000 live births in North Africa [6]. In

85 Ghana, the latest available national data shows that neonatal mortality declined from 28

86 deaths per 1000 live births in 2015 to 17 deaths per 1000 live births in 2022. Similarly, under-

87 five mortality declined from 60 deaths per 1000 live births in 2015 to 40 deaths per 1000 live

88 births and infant mortality stood at 28 deaths per 1000 live births. Mortality during the first

89 month (neonatal mortality) accounts for 61% of infant deaths and 43% of under-5 deaths [7].

90 However, there is wide disparities in the regional burden of child mortality, with the

91 lowest rates of 47 deaths per 1,000 live births occurring in the Greater Accra region and the

92 highest, “111 deaths per 1,000 live births” in the Northern region of Ghana. The Upper East

93 region where this study was conducted has the fourth highest Under-5 mortality of 72 deaths

94 per 1000 live births” following the Upper West regions’ “92 deaths per 1,000 live births”,

95 and Ashanti regions’80 deaths per 1,000 live births [8]. Identifying the causes of deaths and

96 promoting good child health in these regions with high mortality is key to achieving

97 substantial overall reductions in child mortality in Ghana.

98 The healthcare system in the Upper East region has been described as fragile with

99 weak referral care services and low availability of skilled staff, logistics, and medicines [9].

100 In addition, the region represents a typical patriarchal society, characterized by male

101 dominance, restrictive female cultural norms and practices, early marriage and childbearing  
102 among women [10, 11]. Thus, gender inequalities are highly prevalent and skewed  
103 disproportionately against women [8].

104 Several biological, health system and demographic, socioeconomic and cultural  
105 factors have been implicated in the cause of child mortality in Ghana [8,12-14]. Women  
106 empowerment and autonomy has been recognized as an important predictor of maternal and  
107 child healthcare utilization, child survival and wellbeing [13, 15-21]. Over the years,  
108 substantial efforts have been made in Ghana to empower women and improve maternal and  
109 child health [8, 22]. These include provisions in the 1992 Constitution of Ghana especially  
110 Article 17 (1) and (2) which guarantees gender equity, nondiscrimination, and social justice  
111 [23]. Further to these constitutional provisions, Ghana is a signatory to several international  
112 treaties on women and children's rights and committing to attaining international goals such  
113 as the sustainable development goals (SDGs). Other interventions include the implementation  
114 of the Health Sector Medium-Term Development Plan 2010-2013, the Under-five Child  
115 Health Policy (2007-2015), the Integrated Management of Childhood Illness (IMCI),  
116 National Health Insurance Policy, the Free Maternal Delivery Services [8] and the  
117 Community-Based Health Planning and Services (CHPS) Policy [13, 24, 25]. A plethora of  
118 non-Governmental and religious Organizations (NGOs) are also into various dimensions of  
119 "women's empowerment" especially in education, health, and economic emancipation.

120 However, it is not clear the extent to which gender designed programs and policies  
121 have impacted on women ability to make decisions and act appropriately regarding their  
122 health and the health of their children. For instance, are women in Ghana able to make  
123 decisions about their own health or that of their children without censorship by their spouses  
124 and other significant family members? Are children born to women with greater autonomy  
125 more likely to survive compared to those born to women with weak or no autonomy?

126 Addressing these important questions will contribute to knowledge and adoption of policies  
127 and strategies to reduce child mortality and accelerate progress towards the attainment of the  
128 SDG3 target 3.2 in Ghana. This study examined the association between women’s autonomy  
129 and neonatal, infant and under-five mortality in the Upper East Region of Ghana; a region  
130 characterized by patriarchal norms and male dominance.

131

132

## Methods

### 133 **Context of the study data**

134 Data for this study comes from the Ghana Essential Health Intervention Programme  
135 (GEHIP) which was implemented in the Upper East Region of Ghana [26]. GEHIP was  
136 implemented to address bottlenecks in Ghana’s flagship primary healthcare Programme known  
137 as the Community-based Health Planning and Services (CHPS). As a policy, CHPS is designed  
138 to provide a wide range of essential preventive and curative services towards achieving  
139 Universal Health Coverage (UHC). The policy is the product of research findings of the  
140 “Navrongo Community Health and Family Planning” project which demonstrated significant  
141 impact on fertility and child survival [28]

### 142 **Ethics Review and Approval**

143 This study was reviewed and approved by the Navrongo Health Research Centre Institutional  
144 Review Board; reference number **NHRCIRB127**. Participation in the study was voluntary and  
145 written informed consent was obtained from eligible respondent before participation. Consent  
146 for non-literate respondents was administered in the preferred local dialect of the study  
147 participants and witnessed by an adult literate family or community member. Participants who

148 consented to participate in the survey thumb printed the consent forms and were given copies  
149 for their personal keep.

## 150 **Sampling and scope of data collected**

151 Data collection involved a cross-sectional randomized cluster household survey among  
152 women aged 15-49 years old. First, 66 Enumeration Areas (EAs) proportional to population  
153 size were randomly sampled [8]. Household listings for all households in the sampled EAs was  
154 then carried out. Households with eligible respondents (women 15-49 years old) in the sampled  
155 EAs were then randomly selected proportional to the population size of the Enumeration Area.  
156 All eligible women in the sampled households who voluntarily agreed to participate were  
157 interviewed. Data was collected over the period 2<sup>nd</sup> October 2014 to 31<sup>st</sup> December 2015. The  
158 paperless “Open Data Kit” (ODK) software was used in collecting the data [28]. Out of a the  
159 5, 914 interviewed yielding a 76% achieved sample, the analysis was restricted to 3,243 who  
160 reported ever having given birth prior to the survey.

161 Information on detailed reproductive profiles of each woman such as the number of  
162 biological sons and daughters alive, at the time of the survey, the sex of the child, date of birth,  
163 place of birth, and whether the birth was single or multiple were collected. In this study, a live  
164 birth was defined as one in which the child cried or showed signs of life at birth such as  
165 pulsation of the umbilical cord or definite muscle movement. For all children who died,  
166 information on the age at death was obtained. This information enabled us to generate neonatal,  
167 child and under five categories of death. Information on household interactions including  
168 decision-making with respect to the use of money and household resources, utilization of health  
169 services, sexual coercion and social mobility was also obtained from the study participants.  
170 Participants were asked to indicate who usually makes decisions about major household  
171 purchases; how money they earn is spent; and purchases for daily needs. Participants were also  
172 asked if they can visit families and friends without obtaining permission; refuse to have sex

173 with their partner without any severe consequences and lastly whether they needed permission  
174 to seek care at a health facility. These set of questions enabled us to construct a “women’s  
175 autonomy” index as the explanatory variable.

## 176 **Description of Variables**

### 177 **Outcome variables**

178 *Neonatal mortality*: Refers to deaths of newborn children within the first 28 days of life.

179 *Infant and under-five mortality*: Infant mortality refers to all deaths between birth and the first  
180 one-year of life while under-five mortality refers to all deaths between birth and a child’s fifth  
181 birthday.

### 182 **Exposure variable:**

183 Women’s autonomy: This was generated as an index based on a Principal Component Analysis  
184 using five different dimensions of women’s household decision-making with respect to use of  
185 money and household resources, utilization of health services, sexual coercion, and social  
186 mobility.

187 Other covariates were: 15-24, 25-34 and 35-49 years; level of education attained categorized  
188 as None, Primary/Middle/JHS, and Secondary or above; religious affiliation categorized as  
189 Christians, Traditional, Islam and No religion; socio-economic status classified into quintiles  
190 (poorest, very poor, poor, less poor and the least poor); and place of residence grouped into  
191 three as (Urban, Peri-urban, and Rural). Marital status was classified as Married, Separated,  
192 never married, Cohabiting/living together and district of residence.

### 193 **Data analysis**

194 The data was analyzed using Stata version 13. Because of our interest in child mortality, the  
195 analyses were restricted to women who had ever given birth at the time of the survey.



196 Appropriate sample weights were applied to account for the cluster sampling design effects.

197 Both descriptive and inferential statistics were used to obtained study results.

### 198 **Women autonomy index**

199 A principal component analysis (PCA) was used to construct an autonomy index for women  
200 based on six household decision-making variables; spending decider, decider of daily  
201 purchases, decider of major household purchases, can refuse sex, permission to go to health  
202 facility, and visits to family and friends. All six components explain 100% of the variation in  
203 the data and were also found to be associated with the outcome variable. We computed the  
204 statistical adequacy for each variable used for the PCA analysis using the Kaiser-Meyer-Olkin  
205 (KMO). The obtained test value  $\geq 0.5$  indicated that, all variables were significantly adequately  
206 sampled in the analysis generating women's autonomy. The autonomy index obtained was  
207 categorized as least, moderate, and high autonomy.

208

209 The index so obtained was used as the exposure variable while the outcome variables were  
210 neonatal, infant and under-five mortality. All categorical variables were presented as  
211 proportions. First, associations between categorical variables were tested using Pearson's Chi-  
212 squared test. The associations with each of the covariates were then run in univariate logistic  
213 regression models and covariates which were significantly associated with women's autonomy  
214 at the 5% level of significance retained in the multivariate logistic model including all other  
215 variables a prior from literature. All tests in the inferential analyses were deemed statistically  
216 significant at 5% level of statistical significance and a full suite of diagnostic analyses of the  
217 models fitted were performed to assess their appropriateness.

218

219

## Results

220 All the background characteristics (age group, highest level of education attained, religious

221 affiliation, socio-economic status, marital status, and place of residence) were highly

222 significantly associated with women's autonomy status ( $P \leq 0.001$ ), Table 1.

223

224 **Table 1. Background characteristics of study participants by autonomy status**

|                                | Number<br>(N) | Percentage<br>(%) | Autonomy status            |                               |                           | P-value          |
|--------------------------------|---------------|-------------------|----------------------------|-------------------------------|---------------------------|------------------|
|                                |               |                   | Least<br>Percentage<br>(%) | Moderate<br>Percentage<br>(%) | High<br>Percentage<br>(%) |                  |
| <b>Age Group</b>               |               |                   |                            |                               |                           |                  |
| 15 – 24                        | 757           | 23.3              | 28.1                       | 20.9                          | 20.6                      | <b>&lt;0.001</b> |
| 25 – 34                        | 1509          | 46.5              | 42.5                       | 48.7                          | 48.8                      |                  |
| 35 – 49                        | 977           | 30.1              | 29.5                       | 30.4                          | 30.6                      |                  |
| <b>Level of education</b>      |               |                   |                            |                               |                           |                  |
| None                           | 2294          | 70.7              | 74.1                       | 72.7                          | 64.8                      | <b>&lt;0.001</b> |
| Primary/JHS/Middle             | 781           | 24.1              | 22.0                       | 23.8                          | 26.8                      |                  |
| SHS                            | 117           | 3.6               | 2.7                        | 2.5                           | 5.9                       |                  |
| Tertiary                       | 46            | 1.4               | 1.1                        | 1.0                           | 2.3                       |                  |
| Other                          | 5             | 0.2               | 0.1                        | 0.1                           | 0.2                       |                  |
| <b>Religion</b>                |               |                   |                            |                               |                           |                  |
| Christianity                   | 1733          | 53.4              | 51.9                       | 49.0                          | 60.1                      | <b>&lt;0.001</b> |
| Traditional                    | 354           | 10.9              | 13.3                       | 9.9                           | 9.4                       |                  |
| Islam                          | 1089          | 33.6              | 32.1                       | 39.5                          | 28.7                      |                  |
| No religion                    | 67            | 2.1               | 2.7                        | 1.6                           | 1.8                       |                  |
| <b>Socio-economic Status</b>   |               |                   |                            |                               |                           |                  |
| Poorest                        | 590           | 18.2              | 19.3                       | 17.5                          | 17.8                      | <b>&lt;0.001</b> |
| very poor                      | 630           | 19.4              | 20.9                       | 22.1                          | 14.8                      |                  |
| Poor                           | 647           | 20.0              | 20.4                       | 20.9                          | 18.5                      |                  |
| Less poor                      | 669           | 20.6              | 19.3                       | 21.2                          | 21.6                      |                  |
| Least poor                     | 706           | 21.8              | 20.1                       | 18.3                          | 27.5                      |                  |
| <b>Marital status</b>          |               |                   |                            |                               |                           |                  |
| Married                        | 3182          | 98.1              | 99.2                       | 98.7                          | 96.2                      |                  |
| Separated                      | 37            | 1.1               | 0.5                        | 0.9                           | 2.1                       |                  |
| Cohabiting/<br>Living together | 24            | 0.7               | 0.3                        | 0.4                           | 1.7                       |                  |

225

| <b>District of residence</b> |       |      |      |      |      |                  |
|------------------------------|-------|------|------|------|------|------------------|
| Bolgatanga                   | 249   | 7.7  | 6.9  | 5.6  | 10.9 | <b>&lt;0.001</b> |
| Bongo                        | 305   | 9.4  | 10.7 | 6.9  | 10.8 |                  |
| Builsa                       | 500   | 15.4 | 15.7 | 17.3 | 13.2 |                  |
| Garu-Tempane                 | 852   | 26.3 | 21.0 | 27.9 | 30.6 |                  |
| Bawku West                   | 361   | 11.2 | 14.3 | 11.4 | 7.4  |                  |
| Talensi Nabdam               | 489   | 15.0 | 14.5 | 11.1 | 20.0 |                  |
| Bawku East                   | 484   | 15.0 | 17.0 | 20.0 | 7.2  |                  |
| <b>Place of residence</b>    |       |      |      |      |      |                  |
| Urban                        | 215   | 6.7  | 22.3 | 35.1 | 36.2 | <b>&lt;0.001</b> |
| Peri-urban                   | 504   | 15.5 | 26.5 | 46.0 | 32.3 |                  |
| Rural                        | 2,523 | 77.8 | 51.2 | 18.9 | 31.5 |                  |

226

227 Majority of the respondents (46.5%) were aged 25-34 years old and 70.7% of the  
 228 respondents had no education. The high proportion of respondents with low educational  
 229 attainment reflected in the distribution by autonomy status. More than half of the Respondents  
 230 were fairly distributed in terms of socio-economic status ranging from 18.2% among the  
 231 poorest to 21.8% among the least poor. Nearly all respondents (98.1%) were married. A little  
 232 over a quarter of the respondents (26.3%) were from the Garu-Tempane district and the lowest  
 233 proportions of the respondents (7.7%) were from Bolgatanga Municipality. Majority of the  
 234 respondents (77.8%) live in rural communities while 15.5% live in peri-urban settlements; and  
 235 only 6.7% live in urban settlements. Among urban dwellers, the highest proportions were those  
 236 with high autonomy status, followed by those with moderate autonomy status. In contrast, a  
 237 little over half of rural dwellers were those with least autonomy followed by those with high  
 238 autonomy and moderate autonomy (See details in Table 1).

239

## 240 **Distribution of neonatal, child and under-five mortality by** 241 **women's autonomy status**

242

243 Figure 1 shows that proportionally, the highest neonatal (37.3%), infants (37.2%) and under-  
 244 five (35.5%) deaths occurred among women with higher autonomy. The higher the maternal

245 autonomy status, the greater the proportion of neonatal deaths. Maternal autonomy was  
 246 significantly associated with neonatal, infant and under-five mortality.

247

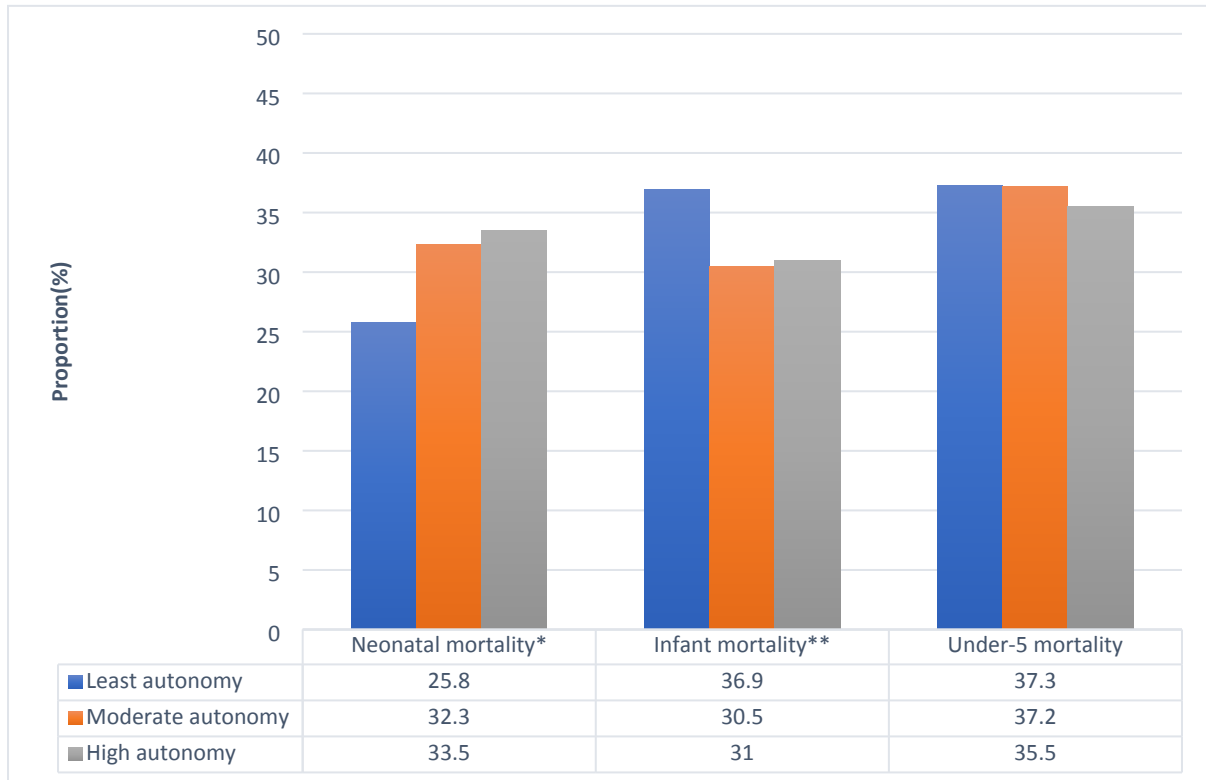

248 **Fig 1.** Percentage distribution of neonatal, infant and under-five mortality by women's  
 249 autonomy status. Level of significance; \*\*\* $p < 0.001$ ; \*\* $p < 0.01$  and \* $p < 0.05$   
 250

251

252

253

254

255

256

257 Table 2. Bivariate and Multivariate analysis of the Association between women’s autonomy and neonatal, infant and under-five mortality

| Variable                             | Neonatal mortality       |                              | Infant mortality        |                              | Under-five mortality    |                              |
|--------------------------------------|--------------------------|------------------------------|-------------------------|------------------------------|-------------------------|------------------------------|
|                                      | Bivariate<br>OR [95% CI] | Multivariate<br>aOR [95% CI] | Bivariate<br>OR[95% CI] | Multivariate<br>aOR [95% CI] | Bivariate<br>OR[95% CI] | Multivariate<br>aOR [95% CI] |
| Autonomy                             |                          |                              |                         |                              |                         |                              |
| Least                                | 1                        | 1                            | 1                       | 1                            | 1                       | 1                            |
| Moderate                             | 1.61[1.03,2.51]*         | 1.76[1.07,2.89]*             | 1.04[0.78,1.38]         | 1.01[0.75,1.36]              | 0.95[0.79,1.15]         | 0.95[0.78,1.15]              |
| High                                 | 1.99[1.30,3.05]**        | 1.75[1.04,1.74]*             | 1.36[1.07,1.74]*        | 1.31[0.93,1.86]              | 1.20[0.95,1.86]         | 1.15[0.89,1.47]              |
| Socio-demographic<br>Characteristics |                          |                              |                         |                              |                         |                              |
| Level of education<br>attained       |                          |                              |                         |                              |                         |                              |
| None                                 | 1                        | 1                            | 1                       | 1                            | 1                       |                              |
| Prim/JHS/Middle                      | 0.53[0.31,0.93]*         | 0.83[0.42,1.61]              | 0.34[0.23,0.49]***      | 0.94[0.63,1.40]              | 0.40[0.31,0.53]***      | 0.87[0.65,1.15]              |
| SHS +                                | 0.75[0.35,4.21]          | 0.70[0.16,3.13]              | 0.21[0.11,0.40]***      | 0.39[0.16,0.94]*             | 0.24[0.16,0.58]***      | 0.39[0.18,0.87]*             |
| Age Group                            |                          |                              |                         |                              |                         |                              |

|                          |                    |                   |                       |                       |                      |                      |
|--------------------------|--------------------|-------------------|-----------------------|-----------------------|----------------------|----------------------|
| 15-24                    | 1                  | 1                 | 1                     | 1                     | 1                    | 1                    |
| 25-34                    | 1.58[0.71,3.50]    | 1.50[0.60,3.73]   | 3.13[2.01,4.87]***    | 3.14[1.94,5.07]***    | 2.50[1.74,3.59]***   | 2.38[1.62,3.50]***   |
| 35-49                    | 4.51[2.32,8.79]*** | 3.97[1.93,8.13]** | 20.55[13.13,32.17]*** | 17.17[10.53,28.02]*** | 13.41[9.48,18.99]*** | 10.87[7.46,15.84]*** |
| Religious<br>Affiliation |                    |                   |                       |                       |                      |                      |
| Christianity             | 1                  | 1                 | 1                     | 1                     | 1                    | 1                    |
| Traditional              | 1.68[1.14,2.48]*   | 1.15[0.70,1.89]   | 2.27[1.70,3.03]***    | 1.11[0.80,1.54]       | 1.88[1.46,2.43]***   | 1.27[1.01,1.60]*     |
| Islam                    | 0.60[0.36,1.01]    | 0.63[0.34,1.18]   | 0.66[0.51,0.86]**     | 0.63[0.46,0.88]**     | 0.68[0.55,0.84]***   | 0.69[0.55,0.86]**    |
| No religion              | 0.68[0.23,2.04]    | 0.57[0.19,1.68]   | 1.62[0.87,3.00]       | 1.71[1.13,2.59]*      | 1.71[1.13,2.59]*     | 1.29[0.83,2.01]      |
| Socio-economic<br>status |                    |                   |                       |                       |                      |                      |
| Poorest                  | 1                  | 1                 | 1                     | 1                     | 1                    | 1                    |
| Very poor                | 1.10[0.56,2.14]    | 0.97[0.47,2.00]   | 0.85[0.59,1.22]       | 0.93[0.64,1.36]       | 0.97[0.78,1.20]      | 1.17[0.94,1.47]      |
| Poor                     | 0.75[0.42,1.33]    | 0.99[0.52,1.88]   | 0.81[0.54,1.21]       | 1.31[0.81,2.09]       | 0.82[0.66,1.03]      | 1.04[0.83,1.31]      |
| Less poor                | 0.73[0.42,1.26]    | 0.74[0.36,1.50]   | 0.93[0.60,1.44]       | 1.11[0.70,1.75]       | 0.02[0.77,1.35]      | 1.19[0.86,1.65]      |
| Least poor               | 0.72[0.42,1.25]    | 0.86[0.46,1.59]   | 0.74[0.49,1.10]       | 1.20[0.76,1.89]       | 0.82[0.62,1.08]      | 1.09[0.85,1.41]      |
| Place of Residence       |                    |                   |                       |                       |                      |                      |

|            |                  |                   |                 |                 |                  |                    |
|------------|------------------|-------------------|-----------------|-----------------|------------------|--------------------|
| Urban      | 1                | 1                 | 1               | 1               | 1                | 1                  |
| Semi-urban | 0.42[0.20,0.87]* | 0.32[0.13,0.81]*  | 0.78[0.24,1.44] | 0.93[0.50,1.74] | 0.68[0.44,1.04]  | 0.69[0.48, 1.01]   |
| Rural      | 0.51[0.27,0.97]* | 0.38[0.19,0.75]** | 0.70[0.45,1.07] | 0.68[0.43,1.08] | 0.69[0.52,0.92*] | 0.63[0.48,0.083]** |

258

Level of significance; \*\*\*p<0.001; \*\*p<0.01 and \*p<0.05

259

260 Presented in table 2 is the bivariate and multivariate regression analysis of the  
261 association of women's autonomy with neonatal, infant and under-five mortality.  
262 Paradoxically, we found a counterintuitive relationship between women's autonomy and  
263 neonatal, infant and under-five mortality. In the unadjusted regression model, moderate  
264 women's autonomy was associated with a statistically significant increased risk of neonatal  
265 death (OR: 1.61, 95% CI 1.03-2.51) compared to those born to women with least autonomy. In  
266 the adjusted regression model, the risk of neonatal death among women with moderate  
267 autonomy compared to those with least autonomy increased slightly (aOR: 1.76, 95% CI 1.07-  
268 2.89) and remained statistically significant. Similarly, higher women's autonomy was  
269 significantly associated with increased neonatal mortality even after adjusting for socio-  
270 demographic factors (aOR: 1.75, 95% CI, 1.04-2.93).

271 Women's autonomy was statistically significantly associated with infant mortality in  
272 the unadjusted regression model (OR=1.36, 95% CI=1.07-1.74) but not in the adjusted model  
273 (aOR=1.31, 95% CI= 0.93-1.86). Similarly, women's autonomy was not significantly  
274 associated with under-five mortality. However, in both the unadjusted and adjusted regression  
275 models, women with high autonomy were 20.0% and 15.0% respectfully more likely to have  
276 experienced an under-five death when compared with those with least autonomy.

277

278

279

280

281

282



283  
284  
285  
286  
287  
288  
289  
290  
291  
292  
293  
294  
295  
296  
297  
298  
299  
300  
301  
302  
303  
304  
305  
306  
307

## Discussion

In this study, we examined the association between women’s autonomy and neonatal, infant and under-five mortality in the Upper East Region of Ghana s study. This is important because the quality of care that children receive is greatly depended on their household circumstances. As primary caregivers, mothers play a critical role in making decisions that directly or indirectly affects the health of children. Yet, the extent to which constricted women’s autonomy adversely affects child mortality has not been sufficiently interrogated in Ghana. Our findings revealed a linear relationship between neonatal mortality and women’s autonomy status; with the highest neonatal deaths occurring among women with high autonomy status. In contrast, the highest infants and under-five deaths occurred among women with the least autonomy status. The adjusted region analysis showed that maternal autonomy was significantly associated with neonatal, infant and under-five mortality. Compared to women with the least autonomy status, infants of those with moderate autonomy and high autonomy were significantly more likely to die.

Our findings differ from some previous studies involving multiple African countries and other developing countries [21, 29, 30] . Adedini and colleagues whose study involved 18 African countries including Ghana, found that higher position of women in a household (based on a composite score of marital dyads), was significantly associated with lower risk of neonatal mortality [29]. Memiah and colleagues’ multi-country study in East Africa (Burundi, Kenya, Rwanda, Tanzania, and Uganda) found that women’s ability to exercise discretion not to have sex without suffering any consequences was significantly associated with 16% less likelihood of under-five mortality. Similarly, Doku and colleagues’ meta-analysis of pooled data from 59, “Low- and Middle-Income Countries” (LMICs), found that women with a lower score of Individual-level Women’s Empowerment Index (ILWEI) had 18%, 12% and 17% higher risk of neonatal, infant and under-five deaths respectfully than those with higher ILWEI. However,

308 country level analysis revealed an inconsistent relationship between WEI and mortality  
309 outcomes [21].

310  
311 The evidence from this study is consistent with a few studies [31]. that showed a weak  
312 or counter intuitive statistically significant associations between women's autonomy and  
313 maternal healthcare utilization, higher maternal autonomy is generally associated with higher  
314 utilization of antenatal care services, skilled birth delivery, postnatal and general child  
315 healthcare [13, 15, 17-20]; which leads to better child health outcomes. This notwithstanding,  
316 our results suggest that the role of significant others in decision-making in child health during  
317 the neonatal and infant period remains critical in this study setting. The observed differences  
318 reported by the various studies may be due the differences in the variables used to measure  
319 women's autonomy index. Thus, there is need to re-examine the appropriateness of autonomy  
320 models that focus on individualism. This is critical given the imbedded context of social  
321 relations and the role of the family in childcare in this and similar study context in Ghana.  
322 Contextual models that incorporates the role of significant others in this and similar settings in  
323 Africa may offer better child health outcomes.

324 Our results do not imply that women empowerment and autonomy is not important in attaining  
325 SDG3. Our study clearly demonstrated the positive effect of maternal educational attainment  
326 in child mortality. In the adjusted regression model, maternal education remained significantly  
327 associated with infant and under-five mortality. Attaining secondary or higher education was  
328 significantly associated with a decreased risk of children dying before attaining their first date  
329 of birth or fifth birthday respectfully when compared with children of women who had no  
330 education. In fact, women who attained Primary/JHS/Middle education were 60% less likely  
331 to experience an under-five death compared to those with no education. These findings are  
332 consistent with empirical literature in Ghana and other countries in Sub-Saharan Africa [32-  
333 38]. and shows that women empowerment remains an important goal and, a means to attaining

334 significant reductions in child mortality in Ghana and Africa. For instance, Babayara et al. [33]  
335 used data from the “Navrongo Demographic and Surveillance system” and found that mothers  
336 who no education accounted for 82.2% of under-five deaths.

337 We conclude that in this study setting women’s autonomy was not protective of child  
338 mortality. In fact, compared to women with diminished autonomy, those with higher autonomy  
339 were significantly more likely to experience neonatal and infant mortality. Given the imbedded  
340 context of social relations and the family system in the study context and similar settings in  
341 Ghana, there is need to re-examine the appropriateness of autonomy models that focus on  
342 individualism. Contextual models that factor in the unique African family systems are more  
343 likely to yield better outcomes.

## 344 **Limitations and strengths of the Study**

345  
346 This study has some inherent limitations. First, it relied on a cross sectional household  
347 survey data and hence is unable to establish any causality between “women’s autonomy” and  
348 the study outcomes (neonatal, infant and under-five mortality). Secondly, “women’s  
349 autonomy” is a fluid and multifaceted concept which is difficult to measure accurately. The  
350 indirect approach used in eliciting information to generate the autonomy variable may not be  
351 very accurate. Notwithstanding these few limitations, this study contributes immensely to  
352 knowledge regarding women’s autonomy and child health and support earlier calls for  
353 prioritizing family and community level factors that promote increased utilization of tailored  
354 essential maternal and new-born care interventions such as appropriate breastfeeding practices,  
355 skilled birth attendance, timely vaccinations, vitamins and minerals supplementation and  
356 prophylactic antibiotics as recommended by the WHO as a strategy to accelerating progress  
357 towards attainment of SDG 3 in Ghana.

358  
359

360 **Acknowledgement**

361

362 We wish to acknowledge and appreciate the study participants for making time out of their

363 busy schedules to participate in the study and for their honest and sincere responses to questions

364 asked which contributed greatly to the quality of the data. We equally acknowledge the

365 contribution of the data collectors for their invaluable contribution. Finally, we appreciate the

366 Management and Staff of the Navrongo Health Research Centre and the Department of

367 Population and Health, of the University of Cape for their various support during the study.

368

## References

- 370  
371  
372 1. United Nations International Children’s Fund (UNICEF). In: The SAGE Encyclopedia  
373 of Children and Childhood Studies [Internet]. SAGE Publications, Inc.; 2020.  
374 Available from: <http://dx.doi.org/10.4135/9781529714388.n604>
- 375 2. Bongaarts J. WHO, UNICEF, UNFPA, World Bank Group, and United Nations  
376 Population Division Trends in Maternal Mortality: 1990 to 2015 Geneva: World Health  
377 Organization, 2015. *Popul Dev Rev* [Internet]. 2016;42(4):726–726. Available from:  
378 <http://dx.doi.org/10.1111/padr.12033>
- 379 3. Ekholuenetale M, Wegbom AI, Tudeme G, Onikan A. Household factors associated  
380 with infant and under-five mortality in sub-Saharan Africa countries. *International*  
381 *Journal of Childcare and Education Policy* [Internet]. 2020;14(1). Available from:  
382 <http://dx.doi.org/10.1186/s40723-020-00075-1>
- 383 4. Hsia RY, Mbembati NA, Macfarlane S, Kruk ME. Access to emergency and surgical  
384 care in sub-Saharan Africa: the infrastructure gap. *Health Policy Plan* [Internet].  
385 2011;27(3):234–44. Available from: <http://dx.doi.org/10.1093/heapol/czr023>
- 386 5. Alkema L, New JR, Pedersen J, You D, Estimation UNI agency G for CM, Group TA.  
387 Child mortality estimation 2013: an overview of updates in estimation methods by the  
388 United Nations Inter-Agency Group for Child Mortality Estimation. *PLoS One*  
389 [Internet]. 2014 Jul 11;9(7):e101112–e101112. Available from:  
390 <https://pubmed.ncbi.nlm.nih.gov/25013954>
- 391 6. Paulson KR, Kamath AM, Alam T, Bienhoff K, Abady GG, Abbas J, Abbasi-Kangevari  
392 M, Abbastabar H, Abd-Allah F, Abd-Elsalam SM, Abdoli A. Global, regional, and  
393 national progress towards Sustainable Development Goal 3.2 for neonatal and child  
394 health: all-cause and cause-specific mortality findings from the Global Burden of  
395 Disease Study 2019. *The Lancet*. 2021 Sep 4;398(10303):870-905.
- 396 7. Ghana Statistical Service. Ghana Demographic and Health Survey 2022. Accra; 2023  
397 May.
- 398 8. Ghana Statistical Service. Ghana Demographic and Health Survey 2014. Accra; 2015  
399 May.
- 400 9. Bawah AA, Awoonor-Williams JK, Asuming PO, Jackson EF, Boyer CB, Kanmiki  
401 EW, Achana SF, Akazili J, Phillips JF. The child survival impact of the Ghana  
402 Essential Health Interventions Program: A health systems strengthening plausibility  
403 trial in Northern Ghana. *PLoS One*. 2019 Jun 12;14(6):e0218025.

- 404 10. Achana FS, Bawah AA, Jackson EF, Welaga P, Awine T, Asuo-Mante E, et al. Spatial  
405 and socio-demographic determinants of contraceptive use in the Upper East region of  
406 Ghana. *Reproductive Health* [Internet]. 2015 Apr 2;12:29. Available from:  
407 <https://pubmed.ncbi.nlm.nih.gov/25890034>
- 408 11. Bawah AA, Akweongo P, Simmons R, Phillips JF. Women's Fears and Men's  
409 Anxieties: The Impact of Family Planning on Gender Relations in Northern Ghana.  
410 *Stud Fam Plann* [Internet]. 1999;30(1):54–66. Available from:  
411 <http://dx.doi.org/10.1111/j.1728-4465.1999.00054.x>
- 412 12. Cresswell J, World Health Organization. Trends in maternal mortality 2000 to 2020:  
413 estimates by WHO, UNICEF, UNFPA, World Bank Group and UNDESA/Population  
414 Division. World Health Organization; 2023 Feb 22.
- 415 13. Ameyaw EK, Tanle A, Kissah-Korsah K, Amo-Adjei J. Women's Health Decision-  
416 Making Autonomy and Skilled Birth Attendance in Ghana. *Int J Reprod Med*  
417 [Internet]. 2016/12/26. 2016;2016:6569514. Available from:  
418 <https://pubmed.ncbi.nlm.nih.gov/28116348>
- 419 14. Welaga P, Moyer CA, Aborigo R, Adongo P, Williams J, Hodgson A, et al. Why are  
420 babies dying in the first month after birth? A 7-year study of neonatal mortality in  
421 northern Ghana. *PLoS One* [Internet]. 2013/03/19. 2013;8(3):e58924–e58924.  
422 Available from: <https://pubmed.ncbi.nlm.nih.gov/23527050>
- 423 15. Adhikari R. Effect of Women's autonomy on maternal health service utilization in  
424 Nepal: a cross sectional study. *BMC Womens Health* [Internet]. 2016 May 13;16:26.  
425 Available from: <https://pubmed.ncbi.nlm.nih.gov/27177683>
- 426 16. Ameyaw EK, Dickson KS, Adde KS. Are Ghanaian women meeting the WHO  
427 recommended maternal healthcare (MCH) utilization? Evidence from a national  
428 survey. *BMC Pregnancy Childbirth* [Internet]. 2021 Feb 23;21(1):161. Available from:  
429 <https://pubmed.ncbi.nlm.nih.gov/33622274>
- 430 17. Lamichhane K. Women's autonomy and utilization of maternal health care services in  
431 rural Nepal. *Nepal Population Journal* [Internet]. 2018;18(17):73–80. Available from:  
432 <http://dx.doi.org/10.3126/npj.v18i17.26379>
- 433 18. Mondal D, Karmakar S, Banerjee A. Women's autonomy and utilization of maternal  
434 healthcare in India: Evidence from a recent national survey. *PLoS One* [Internet]. 2020  
435 Dec 9;15(12):e0243553–e0243553. Available from:  
436 <https://pubmed.ncbi.nlm.nih.gov/33296428>

- 437 19. Obasohan PE, Gana P, Mustapha MA, Umar AE, Makada A, Obasohan DN. Decision  
438 Making Autonomy and Maternal Healthcare Utilization among Nigerian Women. *Int J*  
439 *MCH AIDS* [Internet]. 2019;8(1):11–8. Available from:  
440 <https://pubmed.ncbi.nlm.nih.gov/31049260>
- 441 20. Budu E, Seidu AA, Armah-Ansah EK, Sambah F, Baatiema L, Ahinkorah BO.  
442 Women’s autonomy in healthcare decision-making and healthcare seeking behaviour  
443 for childhood illness in Ghana: Analysis of data from the 2014 Ghana Demographic  
444 and Health Survey. *PLoS One* [Internet]. 2020 Nov 9;15(11):e0241488–e0241488.  
445 Available from: <https://pubmed.ncbi.nlm.nih.gov/33166370>
- 446 21. Doku DT, Bhutta ZA, Neupane S. Associations of women’s empowerment with  
447 neonatal, infant and under-5 mortality in low- and /middle-income countries: meta-  
448 analysis of individual participant data from 59 countries. *BMJ Glob Health* [Internet].  
449 2020 Jan 9;5(1):e001558–e001558. Available from:  
450 <https://pubmed.ncbi.nlm.nih.gov/32133162>
- 451 22. Ministry of Gender, Children and Social Protection. National Gender Policy–  
452 Mainstreaming Gender Equality and Women’s Empowerment into Ghana’s  
453 Development Efforts.
- 454 23. Judicial Service. National Legislative Bodies / National Authorities. 1993. Constitution  
455 of the Republic of Ghana.
- 456 24. Dalinjong PA, Wang AY, Homer CSE. Has the free maternal health policy eliminated  
457 out of pocket payments for maternal health services? Views of women, health  
458 providers and insurance managers in Northern Ghana. *PLoS One*. 2018 Feb  
459 1;13(2):e0184830.
- 460 25. Nyonator FK, Awoonor-Williams JK, Phillips JF, Jones TC, Miller RA. The Ghana  
461 community-based health planning and services initiative for scaling up service delivery  
462 innovation. *Health policy and planning*. 2005 Jan 1;20(1):25-34.
- 463 26. Awoonor-Williams JK, Bawah AA, Nyonator FK, Asuru R, Oduro A, Ofosu A, et al.  
464 The Ghana essential health interventions program: a plausibility trial of the impact of  
465 health systems strengthening on maternal & child survival. *BMC Health Serv Res*  
466 [Internet]. 2013/05/31. 2013;13 Suppl 2(Suppl 2):S3–S3. Available from:  
467 <https://pubmed.ncbi.nlm.nih.gov/23819518>
- 468 27. Pence B, Nyarko P, Phillips J, Debpuur C. The effect of community nurses and health  
469 volunteers on child mortality: The Navrongo Community Health and Family Planning



- 470 Project [Internet]. Population Council; 2005. Available from:  
471 <http://dx.doi.org/10.31899/pgy6.1095>
- 472 28. Anokwa Y, Hartung C, Brunette W, Borriello G, Lerer A. Open-Source Data  
473 Collection in the Developing World. Computer (Long Beach Calif). 2009  
474 Oct;42(10):97–9.
- 475 29. Sunday A Adedini JOASOW. Women’s position in the household as a determinant of  
476 neonatal mortality in sub-Saharan Africa. South African journal of child health . 2019.
- 477 30. Memiah P, Bond T, Opanga Y, Kingori C, Cook C, Mwangi M, et al. Neonatal, infant,  
478 and child mortality among women exposed to intimate partner violence in East Africa:  
479 a multi-country analysis. BMC Womens Health [Internet]. 2020 Jan 23;20(1):10.  
480 Available from: <https://pubmed.ncbi.nlm.nih.gov/31969140>
- 481 31. Chol C, Negin J, Agho KE, Cumming RG. Women’s autonomy and utilisation of  
482 maternal healthcare services in 31 Sub-Saharan African countries: results from the  
483 demographic and health surveys, 2010-2016. BMJ Open [Internet]. 2019 Mar  
484 13;9(3):e023128–e023128. Available from:  
485 <https://pubmed.ncbi.nlm.nih.gov/30867200>
- 486 32. Adjei-Mantey K, Takeuchi K. The effect of in utero exposure to household air  
487 pollution on child health: Evidence from Ghana. Health Policy Open [Internet]. 2021  
488 Jan 8;2:100029. Available from: <https://pubmed.ncbi.nlm.nih.gov/37383503>
- 489 33. Babayara MNK, Addo B. Risk Factors for Child Mortality in the Kassena-Nankana  
490 District of Northern Ghana: A Cross-Sectional Study Using Population-Based Data.  
491 Scientifica (Cairo) [Internet]. 2018 Aug 1;2018:7692379. Available from:  
492 <https://pubmed.ncbi.nlm.nih.gov/30155343>
- 493 34. Dare S, Oduro AR, Owusu-Agyei S, Mackay DF, Gruer L, Manyeh AK, et al.  
494 Neonatal mortality rates, characteristics, and risk factors for neonatal deaths in Ghana:  
495 analyses of data from two health and demographic surveillance systems. Glob Health  
496 Action [Internet]. 2021 Jan 1;14(1):1938871. Available from:  
497 <https://pubmed.ncbi.nlm.nih.gov/34308793>
- 498 35. Kanmiki EW, Bawah AA, Agorinya I, Achana FS, Awoonor-Williams JK, Oduro AR,  
499 et al. Socio-economic and demographic determinants of under-five mortality in rural  
500 northern Ghana. BMC Int Health Hum Rights [Internet]. 2014 Aug 21;14:24.  
501 Available from: <https://pubmed.ncbi.nlm.nih.gov/25145383>
- 502 36. Monden CW, Smits J. Maternal education is associated with reduced female  
503 disadvantages in under-five mortality in sub-Saharan Africa and southern Asia. Int J



- 504           Epidemiol [Internet]. 2012;42(1):211–8. Available from:  
505           <http://dx.doi.org/10.1093/ije/dys201>
- 506    37.    Nyaaba AA, Tanle A, Kobina LK, Ayamga M. Determinants of Under-Five Mortality  
507           in Ghana: Evidence from the Ghana Demographic and Health Survey. International  
508           Journal of Translational Medical Research and Public Health [Internet].  
509           2020;4(2):112–22. Available from: <http://dx.doi.org/10.21106/ijtmrph.161>
- 510    38.    Sarkodie AO. Factors influencing under-five mortality in rural- urban Ghana: An  
511           applied survival analysis. Social Science & Medicine [Internet].  
512           2021;284:114185. Available from: <http://dx.doi.org/10.1016/j.socscimed.2021.114185>  
513  
514  
515
